# Supplementary material for: The Subclonal Architecture of Metastatic Breast Cancer: Results from a Prospective Community-Based Rapid Autopsy Program “CASCADE”
Source: PLoS Med. 2016 Dec 27;13(12):e1002204. doi: 10.1371/journal.pmed.1002204 (PMC5189956; doi:10.1371/journal.pmed.1002204)
Supplement: S2 Table — (XLSX) [file pmed.1002204.s003.xlsx]

## Sheet: S2 - QC
Sample	Exome library	mean_coverage	processing	% Mapped reads duplicates	% Reads OnTarget	OnTarget properly paired	Median Fragment Length	Purity (from facets)
ER1_A1	NimbleGen	134.55	fresh	3.28	72.3	146046503	201	0.67
ER1_A2	NimbleGen	103.18	fresh	3.38	77	111736090	198	0.73
ER1_A3	NimbleGen	81.77	fresh	3.39	76.3	88752205	202	0.6
ER1_A4	NimbleGen	68.89	fresh	2.83	71.98	74724280	196	0.66
ER1_A5	NimbleGen	97.91	fresh	3.02	73.1	106187295	206	0.71
ER1_BP	NimbleGen	115.28	blood pellet	4.13	77.51	124217592	205	NA
ER1_P1A	NimbleGen	71.66	FFPE	6.39	56.09	81607849	143	0.51
ER1_P1B	NimbleGen	68.55	FFPE	5.68	58.84	76709222	150	0.6
ER1_P1C	NimbleGen	57.55	FFPE	6.47	58.04	64261271	151	0.61
ER2_A1	NimbleGen	106.98	fresh	3.52	75.25	116329306	194	0.74
ER2_A2	NimbleGen	99.5	fresh	3.12	73.43	108980989	212	0.49
ER2_A3	NimbleGen	99.57	fresh	3.22	74.36	108334943	209	0.77
ER2_A4	NimbleGen	90.94	fresh	3.16	73.22	99026724	200	0.87
ER2_A5	NimbleGen	92.67	fresh	3.38	76.57	101325897	213	0.37
ER2_A6	NimbleGen	124.08	fresh	3.9	74.79	134241227	196	0.69
ER2_A7	NimbleGen	167.11	fresh	4.13	74.87	181175477	201	0.71
ER2_A8	NimbleGen	95.36	fresh	3.36	76.55	103241870	208	0.57
ER2_BP	NimbleGen	126.07	blood pellet	3.19	62.47	138277526	210	NA
ER2_M1	NimbleGen	121.27	fresh	3.34	62.81	132009464	197	0.49
ER2_P0	NimbleGen	30.73	FFPE	6.23	78.46	32137030	195	0.36
ER2_P1A	NimbleGen	83.74	FFPE	4.38	75.18	92631444	171	0.26
ER2_P1B	NimbleGen	78.96	FFPE	4.36	73.48	87609053	168	0.33
ER2_P1C	NimbleGen	86.19	FFPE	4.28	73.8	96039193	164	0.47
ER3_A1	NimbleGen	165.92	fresh	8.69	66.3	163062652	175	0.82
ER3_A10	NimbleGen	151.55	fresh	9.12	66.63	148590971	174	0.83
ER3_A11	NimbleGen	132.76	fresh	9.58	66.38	129931829	179	0.8
ER3_A12	NimbleGen	140.59	fresh	9.45	65.06	136998171	182	0.75
ER3_A2	NimbleGen	154.88	fresh	6.65	65.39	148586201	187	0.25
ER3_A3	NimbleGen	161.41	fresh	7.29	65.95	158716968	176	0.81
ER3_A4	NimbleGen	179.11	fresh	9.03	67.56	171803202	187	0.72
ER3_A5	NimbleGen	152.83	fresh	7.82	65.91	147854552	181	0.8
ER3_A6	NimbleGen	157.63	fresh	9.97	65.93	151953818	189	0.79
ER3_A7	NimbleGen	149.9	fresh	7.65	66.02	144979027	184	0.77
ER3_A8	NimbleGen	171.82	fresh	6.96	64.95	162214361	206	0.82
ER3_A9	NimbleGen	175.27	fresh	8.44	65.93	165464487	201	0.86
ER3_BP	NimbleGen	138.48	blood pellet	4.57	67.27	133801877	189	NA
ER3_M1	NimbleGen	166.64	FFPE	17.18	69.71	183195632	140	0.41
ER3_M2	NimbleGen	130.07	fresh	4.14	67.01	124571499	188	0.57
ER3_P1A	NimbleGen	62.14	FFPE	20.84	60.14	76479982	116	0.87
ER3_P1B	NimbleGen	84.6	FFPE	22.6	62.33	102089863	121	0.81
TN1_A1	Illumina	200.49	fresh	25.98	51.33	106101943	122	0.71
TN1_A2	Illumina	234.46	fresh	26.78	49.78	122572360	134	0.74
TN1_A3	Illumina	236.3	fresh	28.08	49.67	124032742	131	0.69
TN1_A4	Illumina	196.26	fresh	26.04	50.09	103285408	130	0.8
TN1_A5	Illumina	209.24	fresh	27.29	49.88	109473580	129	0.58
TN1_A6	Illumina	201.34	fresh	30.88	51.62	105438516	131	0.57
TN1_BP	Illumina	206.4	blood pellet	22.69	51.44	108321468	136	NA
TN1_M1	Illumina	197.75	FFPE	31.04	54.7	106200808	112	0.49
TN1_P1A	Illumina	172.33	FFPE	34.43	54.68	92223946	109	0.58
TN1_P1B	Illumina	192	FFPE	30.14	53.84	99962175	129	0.39
TN1_P1C	Illumina	146.79	FFPE	34.88	55.14	79222786	104	0.58
TN1_P1D	Illumina	128.31	FFPE	32.29	53.91	70671543	96	0.49
